1 **Regional Association of Disability and SARS-CoV-2 Infection in 369 Counties of the United States**

2 **Running Title:** SARS-CoV-2 Infection among non-institutionalized disabled population

3 **Authors:** Oluwaseyi Olulana<sup>a</sup>, Vida Abedi<sup>b,d</sup>, Venkatesh Avula<sup>b</sup>, Durgesh Chaudhary<sup>c</sup>, Ayesha Khan<sup>c</sup>, Shima  
4 Shahjouei<sup>c</sup>, Jiang Li<sup>b</sup>, Ramin Zand<sup>c</sup>

5 <sup>a</sup> Geisinger Commonwealth School of Medicine, Scranton PA, United States

6 <sup>b</sup> Department of Molecular and Functional Genomics, Weis Center for Research, Geisinger Health System,  
7 Danville PA, United States.

8 <sup>c</sup> Geisinger Neuroscience Institute, Geisinger Health System, Danville PA, United States.

9 <sup>d</sup> Biocomplexity Institute, Virginia Tech, Blacksburg, VA United States.

10

11 *Word Count: 2076*

12 *Tables:3 (5 tables in supplement)*

13 *Figures: 2 (2 figures in supplement)*

14

15 **Author's contribution:** VA and RZ designed the study. OO and VeA extracted and prepared the data for  
16 analysis. AK and DC performed data validation. JL, RZ, OO, and VA performed the analysis. JL, RZ, OO, SS  
17 and VA contributed to the interpretation of the results. VA and OO wrote the initial draft. All authors provided  
18 critical feedback and contributed to different sections of the manuscript. All authors reviewed and approved the  
19 final version of the manuscript.

20

21 **Source of Funding:** RZ and VA have funding support from the Geisinger Health Plan Quality Fund as well as  
22 the National Institute of Health R56HL116832 (sub-award) during the study period. The funders had no role in  
23 study design, data collection, and interpretation, or the decision to submit the work for publication.

24 **Conflict of Interest:** The authors declare no competing interests.

25 **Corresponding Author:**

26 Ramin Zand, MD, MPH

27 Associate Professor of Neurology and Medicine

28 Director, Stroke Program, Geisinger Northeast Region

29 100 N Academy Ave, Danville PA 17822

30 Ph: 570-808-7330 | Fax: 570-808-3209 | [rzand@geisinger.edu](mailto:rzand@geisinger.edu); [ramin.zand@gmail.com](mailto:ramin.zand@gmail.com)

31

32

33 **Abstract**

34 **Background:** There have been outbreaks of SARS-CoV-2 in long term care facilities and recent reports of  
35 disproportionate death rates among the vulnerable population. The goal of this study was to better understand  
36 the impact of SARS-CoV-2 infection on the non-institutionalized disabled population in the United States using  
37 data from the most affected states as of April 9th, 2020.

38 **Methods:** This was an ecological study of county-level factors associated with the infection and mortality rate  
39 of SARS-CoV-2 in the non-institutionalized disabled population. We analyzed data from 369 counties from the  
40 most affected states (Michigan, New York, New Jersey, Pennsylvania, California, Louisiana, Massachusetts) in  
41 the United States using data available by April 9th, 2020. The variables include changes in mobility reported by  
42 Google, race/ethnicity, median income, education level, health insurance, and disability information from the  
43 United States Census Bureau. Bivariate regression analysis adjusted for state and median income was used to  
44 analyze the association between death rate and infection rate.

45 **Results:** The independent sample t-test of two groups (group 1: Death rate  $\geq$  3.4% [median] and group 2:  
46 Death rate < 3.4%) indicates that counties with a higher total population, a lower percentage of Black males  
47 and females, higher median income, higher education, and lower percentage of disabled population have a  
48 lower rate (< 3.4%) of SARS-CoV-2 related mortality (all  $p$ -values < 4.3E-02). The results of the bivariate  
49 regression when controlled for median income and state show counties with a higher White disabled  
50 population (est: 0.19, 95% CI: 0.01-0.37;  $p$ -value: 3.7E-02), and higher population with independent living  
51 difficulty (est: 0.15, 95% CI: -0.01-0.30;  $p$ -value: 6.0E-02) have a higher rate of SARS-CoV-2 related  
52 mortality. Also, the regression analysis indicates that counties with higher White disabled population (est: -  
53 0.22, 95% CI: -0.43-(-0.02);  $p$ -value: 3.3E-02), higher population with hearing disability (est: -0.26, 95% CI: -  
54 0.42- (-0.11);  $p$ -value: 1.2E-03), and higher population with disability in the 18-34 years age group (est: -0.25,  
55 95% CI: -0.41-(-0.09);  $p$ -value: 2.4E-03) show a lower rate of SARS-CoV-2 infection.

56 **Conclusion:** Our results indicate that while counties with a higher percentage of non-institutionalized disabled  
57 population, especially White disabled population, show a lower infection rate, they have a higher rate of  
58 SARS-CoV-2 related mortality.

59 **Keywords:** Disability disparities, Healthcare disparities, Non-institutionalized disabled population, Racial  
60 disparity, Health disparity, Socioeconomic factors, COVID19, United States, Population-based analysis,  
61 Ecological study.

62

63

## 64 INTRODUCTION

65 The continuous spread of severe acute respiratory syndrome coronavirus 2 (SARS-CoV-2) has highlighted  
66 disparities in the infection and mortality rates of this disease.<sup>1</sup> The outbreak in a nursing home in Kirkland,  
67 Washington<sup>2</sup> was the first to report death due to SARS-CoV-2 in the United States (U.S). As of May 26, 2020,  
68 there are over 5.6 million confirmed cases worldwide, with over 1.6 million SARS-CoV-2 cases and 99,123  
69 deaths in the U.S.<sup>3</sup> SARS-CoV-2 initially attacks the respiratory system;<sup>4</sup> with groups most susceptible to the  
70 infection and death being people aged 65 years and older, as well as people with certain chronic conditions and  
71 comorbidities. People living in nursing homes or long-term care facilities are more prone to the infection.<sup>5,6</sup>  
72 Recently, states are releasing data on the number of deaths from long term care facilities<sup>7</sup> with the most recent  
73 report stating that more than 10,000 patients and staff in long term facilities have died,<sup>8</sup> accentuating the  
74 disparities in the outcomes of the disabled population in the U.S. The populations with higher disability are  
75 affected by the lower quality of care and increased comorbidities<sup>9,10</sup> even before the evidence of disparities in  
76 the SARS-CoV-2 outcomes was reported. However, there have been few reports concerning the non-  
77 institutionalized disabled population and the risk of mortality and infection by SARS-CoV-2.<sup>11</sup> To provide  
78 targeted preventive strategies, adequate resources for the disabled population and their care providers, an  
79 examination into the infection among the non-institutionalized disabled population is a necessary first step.  
80 The goal of this ecological study was to determine the association between county-level non-institutionalized  
81 disability rates, socioeconomic factors, and SARS-CoV-2 infection and death; we hypothesized that non-  
82 institutionalized disability rates in counties are associated with the rate of SARS-CoV-2 infection and death.

## 83 METHODOLOGY:

84 We conducted an ecological analysis of demographic, mobility, socioeconomic, and disability information, in  
85 the context of SARS-CoV-2 data in 369 counties in California, Michigan, New York, New Jersey, Louisiana,  
86 Pennsylvania, and Massachusetts with the initial highest SARS-CoV-2 infection and death rates as of April 9<sup>th</sup>,  
87 2020.

88 Data source:

89 Data sources in this study include publicly available data from United States Census Bureau data estimated for  
90 2018 for demographic data per county<sup>12,13</sup> *USAFACTS* for SARS-CoV-2 cases estimated for the year 2020,<sup>14</sup>  
91 and mobility data provided by Google, as of April 5<sup>th</sup>, 2020.<sup>15</sup>

92 According to Social Security, individuals who cannot engage in substantial productive activity due to  
93 medically diagnosable physical or mental impairment which is expected to lead to death or last for over twelve  
94 months are legally defined as disabled.<sup>16</sup> The non-institutionalized disabled population was defined as  
95 individuals not in a nursing home, prisons, or confined to any other facilities.

96 The data elements in this study included: 1) mobility data for each county, reported by Google on April 5<sup>th</sup>,  
97 2020, that captured percent increase or decrease in mobility (grocery mobility, retail mobility, transit mobility,  
98 park mobility, work mobility, and resident mobility); 2) county-level data for total disabled population by  
99 race/ethnicity, age, gender, and type of disability along with data on total population, median income,  
100 education level, and access to health insurance, all data elements extracted from the United States Census  
101 Bureau. Table 1 summarizes a detailed description of the data elements used in this study. The outcome  
102 variables, infection and mortality rates were reported by USAFACTS.<sup>14</sup> County-level SARS-CoV-2 infection and  
103 mortality cases were extracted from the state's health departments through data from hospitals, nursing homes,  
104 and other health organizations as reported on April 9<sup>th</sup>, 2020.

#### 105 Outcome Measures

106 The outcome measure is the county-level SARS-CoV-2 infection and mortality rates for the non-  
107 institutionalized disabled population. The infection and mortality rates were based on CDC guidelines<sup>17</sup>  
108 (numerator: confirmed cases or death; denominator: total population per county). The mean of the infection  
109 rates or death rates were used for the comparative analysis as described below.

#### 110 Statistical Analysis

111 The data elements in this study were described using their mean  $\pm$  standard deviation unless otherwise stated.  
112 An independent sample t-test was used to determine statistical significance in SARS-CoV-2 infection and  
113 death rates in comparison to the mobility, race/ethnicity, disability, median income, insured population, and  
114 total populations in the 369 counties. Bivariate regression adjusted for the state, and median income,  $\pm$  total

115 population was used to analyze the association between death rate or infection rate. Statistical analyses were  
116 performed using the IBM SPSS Statistics 26<sup>18</sup> and R version 3.6.2.<sup>19</sup>

## 117 **RESULTS**

### 118 **SARS-CoV-2 infection and mortality in the seven states during the first peak of infection in the U.S.**

119 The county-level data from 369 counties from Michigan, New York, New Jersey, Pennsylvania,  
120 Massachusetts, California, and Louisiana (mean population: 276,905.5±683,001.8) with the highest number  
121 of SARS-CoV-2 infection (as of April 9<sup>th</sup>, 2020) in the U.S. were included in this study.

122 The mean and 95% confidence interval (CI) for race/ethnicity, disability age group, and disability by gender  
123 are available in Table S1. The mean rate of disability in the U.S. population for the states used in the study was  
124 15.0% ±3.7%; this rate for males was 13.1%±3.1% and for the female population was at 13.4%±2.8%.

125 Disability in the race/ethnic groups ranged differently with the average of disability in the Black population  
126 (15.4% ±6.1%) as the highest; disability in the Asian population (7.9% ±3.9%) was the lowest; disability rate  
127 in the white population was at 14.0%±2.9%. The age of the disabled population varied with the majority being  
128 75 years or older (47.1%±6.0%) and lowest in disability age group 5 to 17 years at 6.3%±2.5%. Lastly, the  
129 disability types also varied within the population, ambulatory disability represents the highest type of disability  
130 at 7.0%±1.7% on average, while individuals with self-care difficulty were on average at 2.7%±0.7%. The  
131 hearing difficulty was at 3.7% ±1.1%, while vision difficulty was at 2.2%±0.8%, cognitive difficulty at  
132 5.4%±1.4%, and independent living disability was at 6.1%±1.4%. The mean infection rate was  
133 1593.0±2768.9 per million with a median of 555.5, [IQR: 245.2-1486.6] while the mean mortality rate was  
134 3.8%±2.2% and median of 3.4% [IQR: 2.2%-5.4%].

135 The independent sample t-test of the two groups (group 1: Death rate ≥ 3.4% [median] and group 2: Death rate  
136 < 3.4%; Table 2) indicated that counties with a higher total population, reduction in retail mobility, a lower  
137 percentage of Black males and females, higher median income, higher education, lower percentage of disabled  
138 population, and a lower percentage of disabled in the age group of 35 to 64 years had a lower rate (< 3.4%) of  
139 SARS-CoV-2 related mortality (all *p*-values < 4.3E-02). Additionally, a higher rate of SARS-CoV-2 infection  
140 was observed in counties with a higher population, a higher percentage of Black males and females, a higher

141 median income, higher percentage of bachelor or graduate degree, a lower percentage of the disabled  
142 population, specifically a lower percentage of disabled individuals with hearing difficulty, and a lower  
143 percentage of disabled in the age group of 35 to 64 and 65 to 74 years (Table 3, all  $p$ -values<2.3E-02).  
144 **Regression analysis showed a higher white disabled population, and independent living difficulty had a**  
145 **higher rate of SARS-CoV-2 related mortality.**

146 The results of the bivariate regression analysis (Figure 1, Table S2) estimate the effect size of disability sub-  
147 groups associated with SARS-CoV-2 related mortality when controlled for the median income and state.  
148 Counties with a higher percentage of White disabled population (est: 0.19, 95% CI: 0.01-0.37;  $p$ -value:3.7E-  
149 02), higher population with independent living difficulty (est: 0.15, 95% CI: -0.01-0.30;  $p$ -value: 6.0E-02), and  
150 higher disability in the age group 18-34 years (est:0.17, 95% CI: 0.02-0.31;  $p$ -value:2.4E-02) showed a higher  
151 rate of SARS-CoV-2 related mortality. The same trend is observed when controlling for the total population,  
152 median income and state in the bivariate regression model (Figure S1, Table S3).

153 **Regression analysis indicates no significant difference in SARS-CoV-2 related Infection rates among**  
154 **counties with different disability rates.**

155 The bivariate regression analysis was controlled for median income and state (Figure 2, Table S4), we  
156 observed that counties with higher percentage of White disabled population (est: -0.22, 95% CI: -0.43-(-0.02);  
157  $p$ -value: 3.3E-02), higher percentage of people with hearing disability (est: -0.26, 95% CI: -0.42-(-0.11);  $p$ -  
158 value:1.2E-03), and higher percentage of people with disability in the 18-34 years age group (est: -0.25, 95%  
159 CI: -0.41-(-0.09);  $p$ -value:2.4E-03) showed a lower rate of SARS-CoV-2 infection. The bivariate regression  
160 analysis of the SARS-CoV-2 Infection rate when controlled for the total population, median income, and state  
161 showed no observed statistical significance in disability or any of the disability types (Figure S2, Table S5).

## 162 **DISCUSSION**

163 Our results indicate that counties with a higher percentage of non-institutionalized White disabled and a higher  
164 rate of independent living difficulty show a higher rate of SARS-CoV-2 related mortality. These results are  
165 plausible with the knowledge that the disabled population has a higher rate of obesity,<sup>20-23</sup> lack of physical  
166 activity,<sup>20,22,23</sup> diabetes,<sup>9,23,24</sup> higher rates of cardiovascular diseases<sup>9,23,24</sup> that limits their body's ability to fight  
167 the SARS-CoV-2 infection, which can ultimately lead to a poor outcome.<sup>9,10</sup> Another reason for the high



168 mortality rates could be due to the independent living difficulty that may have been compounded by the  
169 pandemic such as transportation limitations, grocery access, reduced opportunity for daily care, and essential  
170 services.<sup>25</sup> Additionally, in anticipation of a supply crisis, many health departments around the U.S. considered  
171 options on how to triage patients who should be given the most aggressive life-saving therapies in the event of  
172 a supply shortage.<sup>26</sup> In Washington state, a plan was put forward to withhold advanced care for patients with  
173 heart failure, chronic lung and liver disease among other organ dysfunctions; diseases that are common co-  
174 morbidities with the adult disabled population.<sup>26-28</sup> Although this action was not officially taken in the U.S,  
175 there is a history of systematic discrimination in policies and treatment of disabled patients and lack of  
176 adequate preparedness for disabled patients during a pandemic.<sup>23</sup>

177 The center for disease control and prevention (CDC) cautioned that difficulty to understand information,  
178 limited mobility, and inability to communicate symptoms/illness may put the disabled patient population at  
179 risk.<sup>29</sup> Alternatively, our results when adjusted for state and median income show counties with higher White  
180 disabled population and higher hearing disabled population have a lower rate of SARS-CoV-2 infection. There  
181 is a possibility that people with a hearing disability are overcompensated with visual information,<sup>30</sup> which  
182 could potentially increase their attentiveness to the visual information concerning the spread of SARS-CoV-2  
183 and their adherence to the enforced state-wide recommendations for the pandemic. Nonetheless, understanding  
184 how this sub-population is potentially better-protected needs further investigation.

185 Additionally, there was no significant difference in any of the disability groups when the analysis was  
186 controlled for population size, median income, and state. Although our bivariate regression analysis results on  
187 SARS-CoV-2 infection rate show there is no significance among states with different disability rates, this  
188 finding is not consistent with reports that the disabled population is at a higher risk of infection,<sup>27,31</sup> we  
189 emphasize that the studied population was non-institutionalized disabled, so the trends may be different from  
190 studies that include both the institutionalized and non-institutionalized disabled population.<sup>31</sup> The influenza  
191 pandemics showed that disabled patients are at an increased risk of infection, but also less likely to have access  
192 to vaccinations or be educated on their medical needs.<sup>31</sup> The disabled population are at an increased risk of  
193 exposure, complication, and death due to their reliance on health services that may be on hold during  
194 pandemics, and if those services are available, they run the risk of exposure to the virus.<sup>31</sup>

195 This study provides some insight into how the counties with higher non-institutionalized disabled population  
196 may be affected by SARS-CoV-2 in the most affected states during the first wave of infection in the United  
197 States. SARS-CoV-2 is a call to pay more attention to this sub-population of non-institutionalized disabled  
198 civilians that are 12.7%<sup>32</sup> of the total U.S population especially since the population is expected to see a 20%  
199 increase in adults over 65 years or older within the next decade,<sup>33</sup> this age group is currently 40%<sup>34</sup> of the  
200 disabled population. It is imperative that policies and programs are being put in place to avoid a public health  
201 crisis in the future for this group.<sup>31</sup>

202 Several limitations were observed in this study; the data used in this study was based on the county level. The  
203 data on the infection rate is likely an underestimate of the true cases, especially for the healthier population. In  
204 the future, we will continue to monitor and study the impact of the infection on this vulnerable population.

205 In conclusion, our results indicate that while counties with a higher percentage of the non-institutionalized  
206 disabled population, especially White disabled population, show a lower infection rate, they have a higher rate  
207 of SARS-CoV-2 related mortality.

208

## 209 References

- 210 1. Vida Abedi, Oluwaseyi Olulana, Venkatesh Avula, Durgesh Chaudhary, Ayesha Khan, Shima Shahjouei,  
211 Jiang Li, R. Z. *Racial, Economic and Health Inequality and COVID-19 Infection in the United States*.
- 212 2. Boodman, Eric and Branswell, H. First Covid-19 outbreak in a U.S. Nursing Home Raises Concerns.  
213 (2020). Available at: [https://www.statnews.com/2020/02/29/new-covid-19-death-raises-concerns-about-](https://www.statnews.com/2020/02/29/new-covid-19-death-raises-concerns-about-virus-spread-in-nursing-homes/)  
214 [virus-spread-in-nursing-homes/](https://www.statnews.com/2020/02/29/new-covid-19-death-raises-concerns-about-virus-spread-in-nursing-homes/). (Accessed: 29th April 2020)
- 215 3. JHU. COVID-19 Dashboard by the Center for Systems Science and Engineering. Available at:  
216 <https://coronavirus.jhu.edu/map.html>. (Accessed: 29th April 2020)
- 217 4. Rothan, H. A. & Byrareddy, S. N. The epidemiology and pathogenesis of coronavirus disease (COVID-19)  
218 outbreak. *J. Autoimmun.* 102433 (2020). doi:10.1016/j.jaut.2020.102433
- 219 5. CDC. People Who Are At Higher Risk. Available at: [https://www.cdc.gov/coronavirus/2019-ncov/need-](https://www.cdc.gov/coronavirus/2019-ncov/need-extra-precautions/people-at-higher-risk.html)  
220 [extra-precautions/people-at-higher-risk.html](https://www.cdc.gov/coronavirus/2019-ncov/need-extra-precautions/people-at-higher-risk.html). (Accessed: 29th April 2020)
- 221 6. Shikha Garg, MD1,\*; Lindsay Kim, MD1,\*; Michael Whitaker, MPH1, 2; Alissa O’Halloran, MSPH1;  
222 Charisse Cummings, MPH1, 3; Rachel Holstein, MPH1, 4; Mila Prill, MSPH1; Shua J. Chai, MD1; Pam D.  
223 Kirley, MPH5; Nisha B. Alden, MPH6; Breanna Kawasaki, MPH6; Kim, M. Hospitalization Rates and  
224 Characteristics of Patients Hospitalized with Laboratory-Confirmed Coronavirus Disease 2019 — COVID-  
225 NET, 14 States, March 1–30, 2020. **69**, (2020).
- 226 7. Chidambaram, P. State Reporting of Cases and Deaths Due to COVID-19 in Long-Term Care Facilities.  
227 *Kaiser Family Foundation* Available at: [https://www.kff.org/medicaid/issue-brief/state-reporting-of-cases-](https://www.kff.org/medicaid/issue-brief/state-reporting-of-cases-and-deaths-due-to-covid-19-in-long-term-care-facilities/?utm_campaign=KFF-2020-Medicaid&utm_source=hs_email&utm_medium=email&utm_content=2&_hsenc=p2ANqtz-_g3x0lLoESTRe6UgazNM0z81iW3Vn2rGNK1)  
228 [and-deaths-due-to-covid-19-in-long-term-care-facilities/?utm\\_campaign=KFF-2020-](https://www.kff.org/medicaid/issue-brief/state-reporting-of-cases-and-deaths-due-to-covid-19-in-long-term-care-facilities/?utm_campaign=KFF-2020-Medicaid&utm_source=hs_email&utm_medium=email&utm_content=2&_hsenc=p2ANqtz-_g3x0lLoESTRe6UgazNM0z81iW3Vn2rGNK1)  
229 [Medicaid&utm\\_source=hs\\_email&utm\\_medium=email&utm\\_content=2&\\_hsenc=p2ANqtz-](https://www.kff.org/medicaid/issue-brief/state-reporting-of-cases-and-deaths-due-to-covid-19-in-long-term-care-facilities/?utm_campaign=KFF-2020-Medicaid&utm_source=hs_email&utm_medium=email&utm_content=2&_hsenc=p2ANqtz-_g3x0lLoESTRe6UgazNM0z81iW3Vn2rGNK1)  
230 [\\_g3x0lLoESTRe6UgazNM0z81iW3Vn2rGNK1](https://www.kff.org/medicaid/issue-brief/state-reporting-of-cases-and-deaths-due-to-covid-19-in-long-term-care-facilities/?utm_campaign=KFF-2020-Medicaid&utm_source=hs_email&utm_medium=email&utm_content=2&_hsenc=p2ANqtz-_g3x0lLoESTRe6UgazNM0z81iW3Vn2rGNK1). (Accessed: 29th April 2020)
- 231 8. Kaiser Family Foundation. More than 10,000 People in Long-Term Care Facilities Have Died Due to  
232 COVID-19. Available at: [https://www.kff.org/medicaid/press-release/more-than-10000-people-in-long-](https://www.kff.org/medicaid/press-release/more-than-10000-people-in-long-term-care-facilities-have-died-due-to-covid-19/)  
233 [term-care-facilities-have-died-due-to-covid-19/](https://www.kff.org/medicaid/press-release/more-than-10000-people-in-long-term-care-facilities-have-died-due-to-covid-19/). (Accessed: 29th April 2020)
- 234 9. Reichard, A., Stolze, H. & Fox, M. H. Health disparities among adults with physical disabilities or  
235 cognitive limitations compared to individuals with no disabilities in the United States. *Disabil. Health J.* **4**,  
236 59–67 (2011).

- 237 10. Havercamp, S. M., Scandlin, D. & Roth, M. Health disparities among adults with developmental disabilities,  
238 adults with other disabilities, and adults not reporting disability in North Carolina. *Public Health Rep.* **119**,  
239 418–426 (2004).
- 240 11. Pulrang, A. COVID-19 Teaches Us A Lot About Differences In The Disability Community. (2020).  
241 Available at: [https://www.forbes.com/sites/andrewpulrang/2020/04/30/covid-19-teaches-us-a-lot-about-](https://www.forbes.com/sites/andrewpulrang/2020/04/30/covid-19-teaches-us-a-lot-about-differences-in-the-disability-community/#1d756a6b7714)  
242 [differences-in-the-disability-community/#1d756a6b7714](https://www.forbes.com/sites/andrewpulrang/2020/04/30/covid-19-teaches-us-a-lot-about-differences-in-the-disability-community/#1d756a6b7714). (Accessed: 29th April 2020)
- 243 12. United States Census. DISABILITY CHARACTERISTICS. Available at:  
244 [https://data.census.gov/cedsci/table?q=Disability&tid=ACSS1Y2018.S1810&t=Disability&y=2018&g=01](https://data.census.gov/cedsci/table?q=Disability&tid=ACSS1Y2018.S1810&t=Disability&y=2018&g=0100000US.050000&layer=VT_2018_050_00_PY_D1&hidePreview=true)  
245 [00000US.050000&layer=VT\\_2018\\_050\\_00\\_PY\\_D1&hidePreview=true](https://data.census.gov/cedsci/table?q=Disability&tid=ACSS1Y2018.S1810&t=Disability&y=2018&g=0100000US.050000&layer=VT_2018_050_00_PY_D1&hidePreview=true). (Accessed: 30th April 2020)
- 246 13. United States Census. Explore Census Data. Available at: <https://data.census.gov/cedsci/>. (Accessed: 12th  
247 April 2020)
- 248 14. Coronavirus Locations: COVID-19 Map by County and State. Available at:  
249 <https://usafacts.org/visualizations/coronavirus-covid-19-spread-map/>. (Accessed: 12th April 2020)
- 250 15. Google. See how your community is moving around differently due to COVID-19. Available at:  
251 <https://www.google.com/covid19/mobility/>. (Accessed: 12th April 2020)
- 252 16. Social Security. Disability Evaluation Under Social Security. Available at:  
253 <https://www.ssa.gov/disability/professionals/bluebook/general-info.htm>. (Accessed: 29th April 2020)
- 254 17. CDC. Principles of Public Health Practice, Third Edition. Available at:  
255 <https://www.cdc.gov/csels/dsepd/ss1978/lesson3/section2.html>. (Accessed: 10th June 2020)
- 256 18. IBM. Downloading IBM SPSS Statistics 25. *Ibm* (2020). Available at: [https://www.ibm.com/analytics/spss-](https://www.ibm.com/analytics/spss-statistics-software)  
257 [statistics-software](https://www.ibm.com/analytics/spss-statistics-software).
- 258 19. The R Foundation. The R Project for Statistical Computing. *Http://Www.R-Project.Org/* 1–12 (2018).
- 259 20. Tobergte, D. R. & Curtis, S. Disability and Health in the United States, 2001-2005. *J. Chem. Inf. Model.* **53**,  
260 1689–1699 (2013).
- 261 21. Froehlich-Grobe, Katherine and Lollar, D. Obesity and Disability: Time to Act. *Am. J. Prev. Med.* **41**, 541–  
262 545 (2011).
- 263 22. Brian S. Armour, PhD Charles Adam Brush, MSW, MPH Vincent A. Campbell, PhD John E. Crews, MA,  
264 DPA Bradford P. Goodwin, BFA Julie Hentz, BA Namita S. Joshi, MA, MPA Theresa Kanter, MURP

- 265 Roland Richard, MPH Mark E. Swanson, MD, MPH Candice Jalonen Swartwood, and D. L. Disability and  
266 Health State Chartbook. Profiles of Health for Adults With Disabilities. *Cent. DI* (2006).
- 267 23. Krahn, G. L., Walker, D. K. & Correa-De-Araujo, R. Persons with disabilities as an unrecognized health  
268 disparity population. *Am. J. Public Health* **105**, S198–S206 (2015).
- 269 24. Reichard, A. & Stolzle, H. Diabetes among adults with cognitive limitations compared to individuals with  
270 no cognitive disabilities. *Intellect. Dev. Disabil.* **49**, 141–154 (2011).
- 271 25. Pineda, V. S. & Corburn, J. Disability, Urban Health Equity, and the Coronavirus Pandemic: Promoting  
272 Cities for All. *J. Urban Heal.* (2020). doi:10.1007/s11524-020-00437-7
- 273 26. Weise, Karen and Baker, M. Chilling’ Plans: Who Gets Care as Washington State Hospitals Fill Up? *The*  
274 *New York Times* Available at: [https://www.nytimes.com/2020/03/20/us/coronavirus-in-seattle-washington-](https://www.nytimes.com/2020/03/20/us/coronavirus-in-seattle-washington-state.html)  
275 [state.html](https://www.nytimes.com/2020/03/20/us/coronavirus-in-seattle-washington-state.html). (Accessed: 18th June 2020)
- 276 27. Turk, M. A., Landes, S. D., Formica, M. K. & Goss, K. D. Intellectual and developmental disability and  
277 COVID-19 case-fatality trends: TriNetX analysis. *Disabil. Health J.* 100942 (2020).  
278 doi:10.1016/j.dhjo.2020.100942
- 279 28. Wu, Y., Huang, H., Wu, B., McCrone, S. & Lai, H. J. Age distribution and risk factors for the onset of  
280 severe disability among community-dwelling older adults with functional limitations. *J. Appl. Gerontol.* **26**,  
281 258–273 (2007).
- 282 29. Control, C. for D. People With Disabilities. Available at: [https://www.cdc.gov/coronavirus/2019-ncov/need-](https://www.cdc.gov/coronavirus/2019-ncov/need-extra-precautions/people-with-disabilities.html)  
283 [extra-precautions/people-with-disabilities.html](https://www.cdc.gov/coronavirus/2019-ncov/need-extra-precautions/people-with-disabilities.html). (Accessed: 18th June 2020)
- 284 30. Hauthal, N., Sandmann, P., Debener, S. & Thome, J. D. Visual movement perception in deaf and hearing  
285 individuals. *Adv. Cogn. Psychol.* **9**, 53–61 (2013).
- 286 31. Campbell, V. A., Gilyard, J. A., Sinclair, L., Sternberg, T. & Kailes, J. I. Preparing for and responding to  
287 pandemic influenza: Implications for people with disabilities. *Am. J. Public Health* **99**, 294–300 (2009).
- 288 32. United States Census. Anniversary of Americans With Disabilities Act: July 26, 2019. Available at:  
289 <https://www.census.gov/newsroom/facts-for-features/2019/disabilities-act.html>. (Accessed: 26th May 2020)
- 290 33. Colby, S. L. & Ortman, J. M. The Baby Boom Cohort in the United States : 2012 to 2060. *US Census Bur.*  
291 16 (2014). doi:P25-1141
- 292 34. Control, C. for D. Disability Impacts All of Us. Available at:

293 <https://www.cdc.gov/ncbddd/disabilityandhealth/infographic-disability-impacts-all.html>. (Accessed: 26th  
294 May 2020)  
295  
296  
297

298 **Figure and Table Legends:**

299 **Table 1.** Description of Data Elements

300 **Table 2.** Independent sample t-test comparing counties with a higher and lower median death rate

301 **Table 3.** Independent sample t-test comparing counties with a higher and lower median infection rate

302 **Figure 1.** Death due to SARS-CoV-2 when controlled for state and median income

303 **Figure 2.** Infection due to SARS-CoV-2 when controlled for the state and median income

304

305 **Table S1.** Independent sample t-test with comprehensive summary statistics comparing counties data element:  
306 mean, minimum, maximum, confidence interval lower and upper bound

307 **Table S2.** Detailed results of the bivariate analysis of risk of death by SARS-CoV-2 when controlled for state,  
308 and median income

309 **Table S3.** Detailed results of the bivariate analysis of the risk of death by SARS-CoV-2 when controlled for  
310 the state, median income, and total population

311 **Table S4.** Detailed results of the bivariate analysis of the risk of infection by SARS-CoV-2 when controlled  
312 for state, and median income

313 **Table S5.** Detailed results of the bivariate analysis of the rate of infection by SARS-CoV-2 when controlled  
314 for the state, median income, and total population

315

316 **Figure S1.** Death due to SARS-CoV-2 controlled for state, median income and total population

317 **Figure S2.** Infection due to SARS-CoV-2 controlled for the state, median income and total population

318

Table 1: Description of Data Elements

| Data Elements                   | Description                                                                                                                 |
|---------------------------------|-----------------------------------------------------------------------------------------------------------------------------|
| Total population                | Total population                                                                                                            |
| SARS-CoV-2 infection rate       | Rate of SARS-CoV-2 infection in one per million                                                                             |
| SARS-CoV-2 infection death rate | Rate of SARS-CoV-2 infection related death (percent)                                                                        |
| Retail mobility                 | Google retail recreation mobility                                                                                           |
| Grocery mobility                | Google grocery pharmacy mobility                                                                                            |
| Park mobility                   | Google parks mobility                                                                                                       |
| Transit mobility                | Google transit mobility                                                                                                     |
| Work mobility                   | Google workplace mobility                                                                                                   |
| Resident mobility               | Google residential mobility                                                                                                 |
| Black male                      | Percent Black alone male                                                                                                    |
| Black female                    | Percent Black alone female                                                                                                  |
| Asian male                      | Percent Asian alone male                                                                                                    |
| Asian female                    | Percent Asian alone female                                                                                                  |
| White male                      | Percent Non-Hispanic White alone male                                                                                       |
| White female                    | Percent Non-Hispanic White alone female                                                                                     |
| Hispanic male                   | Percent Hispanic male                                                                                                       |
| Hispanic female                 | Percent Hispanic female                                                                                                     |
| Median income                   | Median family income; past 12 months 2018                                                                                   |
| Poverty                         | Percent below poverty level population for whom poverty status is determined                                                |
| High school                     | Percent below poverty level population for whom poverty status is determined RACE and HISPANIC OR LATINO ORIGIN White alone |
| Bachelors                       | Percent population 25 years and over bachelor's degree or higher                                                            |
| Insured male                    | Percent insured civilian noninstitutionalized population SEX male                                                           |
| Insured female                  | Percent insured civilian noninstitutionalized population SEX female                                                         |
| Insured Black                   | Percent insured civilian noninstitutionalized population RACE and HISPANIC OR LATINO ORIGIN Black or African American alone |



|                                  |                                                                                                                                |
|----------------------------------|--------------------------------------------------------------------------------------------------------------------------------|
| Insured Asian                    | Percent insured civilian noninstitutionalized population RACE and HISPANIC OR LATINO ORIGIN ASIAN alone                        |
| Insured Hispanic                 | Percent insured civilian noninstitutionalized population RACE and HISPANIC OR LATINO ORIGIN Hispanic or Latino of any race     |
| Insured White alone              | Percent insured civilian noninstitutionalized population RACE and HISPANIC OR LATINO ORIGIN White alone not Hispanic or Latino |
| Medicaid                         | Percent public coverage Medicaid means tested public coverage alone or in combination                                          |
| Disability                       | Percent with a disability total civilian non-institutionalized population                                                      |
| Disability male                  | Percent with a disability SEX Male                                                                                             |
| Disability female                | Percent with a disability SEX Female                                                                                           |
| Disability Black                 | Percent with a disability RACE AND HISPANIC OR LATINO ORIGIN Black or African American                                         |
| Disability Asian                 | Percent with a disability RACE AND HISPANIC OR LATINO ORIGIN Asian alone                                                       |
| Disability White                 | Percent with a disability RACE AND HISPANIC OR LATINO ORIGIN White alone, not Hispanic or Latino                               |
| Disability Hispanic              | Percent with a disability RACE AND HISPANIC OR LATINO ORIGIN Hispanic or Latino (of any race)                                  |
| Disability 5 to 17 years         | Percent with a disability AGE 5 to 17 years                                                                                    |
| Disability 18 to 34 years        | Percent with a disability AGE 18 to 34 years                                                                                   |
| Disability 35 to 64 years        | Percent with a disability AGE 35 to 64 years                                                                                   |
| Disability 65 to 74 years        | Percent with a disability AGE 65 to 74 years                                                                                   |
| Disability 75 years and over     | Percent with a disability AGE 75 years                                                                                         |
| Disability hearing difficulty    | Percent with a disability with a hearing difficulty                                                                            |
| Disability vision difficulty     | Percent with a disability with a vision difficulty                                                                             |
| Disability cognitive difficulty  | Percent with a disability with a cognitive difficulty                                                                          |
| Disability ambulatory difficulty | Percent with disability with an ambulatory difficulty                                                                          |
| Disability self-care difficulty  | Percent with a disability with self-care difficulty                                                                            |
| Disability independent living    | Percent with a disability with independent living difficulty                                                                   |

Table 2: Independent sample t-test comparing counties with higher and lower median death rate

| Data Elements              | Total             |                | Group 1: SARS-CoV-2 death rate $\geq$ 3.4 |                | Group 2: SARS-CoV-2 death rate $<$ 3.4 |                | Significance |
|----------------------------|-------------------|----------------|-------------------------------------------|----------------|----------------------------------------|----------------|--------------|
|                            | Mean <sup>+</sup> | Std. Deviation | Mean <sup>+</sup>                         | Std. Deviation | Mean <sup>+</sup>                      | Std. Deviation |              |
| Total population           | 276905.47         | 683001.80      | 295707.40                                 | 476086.20      | 605705.70                              | 1113765.30     | 9.9E-03      |
| SARS-CoV-2 infection Rate* | 1593.00           | 2768.90        | 2483.40                                   | 3390.40        | 2306.30                                | 3275.70        | 7.0E-01      |
| Retail mobility            | -0.46             | 0.16           | -0.46                                     | 0.14           | -0.52                                  | 0.11           | 1.9E-03      |
| Grocery mobility           | -0.16             | 0.15           | -0.16                                     | 0.13           | -0.20                                  | 0.14           | 3.3E-02      |
| Park mobility              | 0.05              | 0.59           | 0.02                                      | 0.60           | 0.21                                   | 0.61           | 5.3E-02      |
| Transit mobility           | -0.47             | 0.20           | -0.48                                     | 0.21           | -0.48                                  | 0.20           | 9.7E-01      |
| Work mobility              | -0.37             | 0.10           | -0.38                                     | 0.09           | -0.40                                  | 0.07           | 7.5E-02      |
| Resident mobility          | 0.14              | 0.06           | 0.15                                      | 0.06           | 0.14                                   | 0.04           | 8.1E-02      |
| Black male                 | 5.30              | 6.60           | 7.30                                      | 7.40           | 5.20                                   | 4.60           | 1.6E-02      |
| Black female               | 4.90              | 6.90           | 7.30                                      | 8.00           | 5.40                                   | 5.30           | 4.3E-02      |
| Asian male                 | 1.50              | 2.50           | 1.65                                      | 2.35           | 2.80                                   | 3.50           | 6.2E-03      |
| Asian female               | 1.60              | 2.70           | 1.80                                      | 2.50           | 3.10                                   | 3.80           | 5.8E-03      |
| White male                 | 37.10             | 9.90           | 34.00                                     | 10.70          | 33.30                                  | 9.50           | 6.3E-01      |
| White female               | 37.60             | 10.00          | 34.70                                     | 10.80          | 34.70                                  | 10.80          | 9.4E-01      |
| Hispanic male              | 5.20              | 6.70           | 6.00                                      | 8.10           | 7.20                                   | 6.90           | 2.3E-01      |
| Hispanic female            | 4.80              | 6.60           | 5.80                                      | 8.10           | 7.00                                   | 6.80           | 2.4E-01      |
| Median income              | 69910.10          | 19295.80       | 69778.60                                  | 19887.00       | 83430.40                               | 20397.10       | 2.0E-06      |
| Poverty                    | 15.10             | 5.80           | 16.00                                     | 5.70           | 12.70                                  | 4.70           | 5.0E-06      |
| High school                | 87.60             | 5.50           | 86.40                                     | 6.10           | 88.60                                  | 4.70           | 3.0E-03      |
| Bachelors                  | 24.70             | 10.80          | 24.50                                     | 10.80          | 31.80                                  | 10.90          | 2.0E-06      |
| Insured male               | 91.50             | 3.40           | 91.10                                     | 3.20           | 92.50                                  | 3.00           | 1.5E-03      |
| Insured female             | 93.60             | 3.00           | 93.20                                     | 3.10           | 94.40                                  | 2.50           | 2.8E-03      |
| Insured Black              | 91.30             | 6.30           | 90.40                                     | 6.40           | 92.20                                  | 3.00           | 1.2E-02      |
| Insured Asian              | 90.30             | 12.20          | 90.00                                     | 11.10          | 92.50                                  | 4.20           | 2.9E-02      |
| Insured Hispanic           | 86.00             | 10.30          | 84.80                                     | 9.70           | 86.00                                  | 7.40           | 3.0E-01      |
| Insured White alone        | 93.90             | 2.70           | 93.80                                     | 2.60           | 95.30                                  | 2.00           | 1.0E-05      |
| Medicaid                   | 23.20             | 6.60           | 24.30                                     | 7.30           | 20.60                                  | 6.40           | 1.7E-04      |
| Disability                 | 15.00             | 3.70           | 14.30                                     | 3.30           | 12.90                                  | 3.00           | 8.1E-04      |
| Disability male            | 13.10             | 3.10           | 13.10                                     | 3.30           | 12.30                                  | 2.80           | 1.4E-01      |
| Disability female          | 13.40             | 2.80           | 13.50                                     | 2.80           | 12.80                                  | 2.60           | 1.3E-01      |

|                                          |       |      |       |      |       |      |         |
|------------------------------------------|-------|------|-------|------|-------|------|---------|
| Disability Black                         | 15.40 | 6.10 | 15.50 | 4.70 | 14.80 | 6.40 | 4.9E-01 |
| Disability Asian                         | 7.90  | 3.90 | 7.30  | 3.00 | 7.80  | 4.10 | 5.2E-01 |
| Disability White                         | 14.00 | 2.85 | 14.20 | 3.10 | 13.30 | 2.50 | 5.0E-02 |
| Disability Hispanic                      | 11.40 | 4.90 | 11.70 | 6.10 | 11.10 | 4.20 | 5.2E-01 |
| Disability 5 to 17 years                 | 6.30  | 2.50 | 6.30  | 2.80 | 6.00  | 2.00 | 4.8E-01 |
| Disability 18 to 34 years                | 7.10  | 2.30 | 7.20  | 2.30 | 6.70  | 2.20 | 1.4E-01 |
| Disability 35 to 64 years                | 13.00 | 3.90 | 13.20 | 4.00 | 12.00 | 3.60 | 2.9E-02 |
| Disability 65 to 74 years                | 23.30 | 5.20 | 23.60 | 5.50 | 22.60 | 5.00 | 2.4E-01 |
| Disability 75 years and over             | 47.10 | 6.00 | 47.80 | 6.70 | 46.70 | 5.60 | 2.6E-01 |
| Disability hearing difficulty            | 3.70  | 1.10 | 3.50  | 1.10 | 3.50  | 0.88 | 7.0E-01 |
| Disability vision difficulty             | 2.20  | 0.77 | 2.30  | 0.89 | 2.10  | 0.67 | 1.5E-01 |
| Disability cognitive difficulty          | 5.40  | 1.40 | 5.50  | 1.50 | 5.20  | 1.30 | 1.9E-01 |
| Disability ambulatory difficulty         | 7.00  | 1.70 | 7.10  | 1.70 | 6.60  | 1.60 | 6.3E-02 |
| Disability self-care difficulty          | 2.70  | 0.71 | 2.80  | 0.63 | 2.70  | 0.64 | 1.2E-01 |
| Disability independent living difficulty | 6.10  | 1.40 | 6.10  | 1.30 | 5.90  | 1.30 | 1.6E-01 |

+ All reported numbers are in percent except total population, SARS-CoV-2 infection rate, and median income.

\* Rate of SARS-CoV-2 infection in one per Million

Table 3: Independent sample t-test comparing counties with higher and lower median infection rate

| Data Elements         | Total (N:352)     |                | Group 1: SARS-CoV-2 Infection Rate $\geq 555.6^*$ |                | Group 2: SARS-CoV-2 Infection Rate $< 555.6^*$ |                | Significance |
|-----------------------|-------------------|----------------|---------------------------------------------------|----------------|------------------------------------------------|----------------|--------------|
|                       | Mean <sup>+</sup> | Std. Deviation | Mean <sup>+</sup>                                 | Std. Deviation | Mean <sup>+</sup>                              | Std. Deviation |              |
| Total population      | 276905.47         | 683001.80      | 382607.10                                         | 858300.10      | 196740.20                                      | 468817.40      | 1.2E-02      |
| SARS-CoV-2 death Rate | 3.83              | 2.20           | 3.50                                              | 2.00           | 4.60                                           | 2.60           | 5.0E-03      |
| Retail mobility       | -0.46             | 0.16           | -0.49                                             | 0.15           | -0.44                                          | 0.15           | 3.0E-03      |
| Grocery mobility      | -0.16             | 0.15           | -0.17                                             | 0.14           | -0.14                                          | 0.13           | 9.1E-02      |
| Park mobility         | 0.05              | 0.59           | 0.24                                              | 0.52           | -0.20                                          | 0.57           | 6.4E-08      |
| Transit mobility      | -0.47             | 0.20           | -0.47                                             | 0.21           | 0.47                                           | 0.17           | 8.6E-01      |
| Work mobility         | -0.37             | 0.10           | -0.39                                             | 0.09           | -0.36                                          | 0.07           | 3.1E-02      |
| Resident mobility     | 0.14              | 0.06           | 0.15                                              | 0.06           | 0.14                                           | 0.06           | 5.7E-01      |
| Black male            | 5.30              | 6.60           | 8.20                                              | 7.30           | 2.60                                           | 4.30           | 1.8E-16      |
| Black female          | 4.90              | 6.90           | 8.20                                              | 7.70           | 1.90                                           | 3.90           | 1.8E-19      |
| Asian male            | 1.50              | 2.50           | 1.90                                              | 2.90           | 1.20                                           | 2.10           | 1.0E-02      |
| Asian female          | 1.60              | 2.70           | 2.00                                              | 3.10           | 1.30                                           | 2.30           | 1.5E-02      |
| White male            | 37.10             | 9.90           | 34.20                                             | 8.70           | 39.40                                          | 10.40          | 5.3E-07      |
| White female          | 37.60             | 10.00          | 35.10                                             | 9.10           | 39.70                                          | 10.50          | 1.4E-05      |
| Hispanic male         | 5.20              | 6.70           | 4.70                                              | 4.60           | 5.80                                           | 8.40           | 1.3E-01      |
| Hispanic female       | 4.80              | 6.60           | 4.50                                              | 4.70           | 5.40                                           | 8.20           | 2.2E-01      |
| Median income         | 69910.10          | 19295.80       | 76027.50                                          | 22996.80       | 65111.50                                       | 12876.50       | 8.9E-08      |
| Poverty               | 15.10             | 5.80           | 14.90                                             | 6.30           | 15.30                                          | 5.10           | 5.1E-01      |
| High school           | 87.60             | 5.50           | 87.40                                             | 5.40           | 87.60                                          | 5.60           | 7.9E-01      |
| Bachelors             | 24.70             | 10.80          | 28.10                                             | 12.30          | 21.90                                          | 8.10           | 4.3E-08      |
| Insured male          | 91.50             | 3.40           | 91.50                                             | 3.70           | 91.50                                          | 2.70           | 7.7E-01      |
| Insured female        | 93.60             | 3.00           | 93.60                                             | 3.30           | 93.70                                          | 2.60           | 6.2E-01      |
| Insured Black         | 91.30             | 6.30           | 90.70                                             | 5.50           | 91.80                                          | 6.90           | 9.7E-02      |
| Insured Asian         | 90.30             | 12.20          | 90.00                                             | 13.10          | 90.10                                          | 11.50          | 9.5E-01      |
| Insured Hispanic      | 86.00             | 10.30          | 84.20                                             | 10.60          | 87.50                                          | 9.10           | 2.7E-03      |
| Insured White alone   | 93.90             | 2.70           | 94.20                                             | 2.90           | 93.70                                          | 2.30           | 1.0E-01      |
| Medicaid              | 23.20             | 6.60           | 22.30                                             | 6.60           | 24.00                                          | 6.40           | 1.4E-02      |
| Disability            | 15.00             | 3.70           | 14.10                                             | 3.70           | 15.60                                          | 3.40           | 2.3E-04      |
| Disability male       | 13.10             | 3.10           | 12.60                                             | 3.10           | 13.80                                          | 3.00           | 6.2E-03      |
| Disability female     | 13.40             | 2.80           | 13.10                                             | 2.80           | 13.80                                          | 2.80           | 8.6E-02      |
| Disability Black      | 15.40             | 6.10           | 14.80                                             | 6.20           | 16.90                                          | 5.50           | 6.7E-02      |

|                                          |       |      |       |      |       |      |         |
|------------------------------------------|-------|------|-------|------|-------|------|---------|
| Disability Asian                         | 7.90  | 3.90 | 7.60  | 4.00 | 8.50  | 3.60 | 2.5E-01 |
| Disability White                         | 14.00 | 2.85 | 13.20 | 2.70 | 15.20 | 2.60 | 6.9E-07 |
| Disability Hispanic                      | 11.40 | 4.90 | 11.60 | 5.00 | 11.00 | 5.00 | 3.9E-01 |
| Disability 5 to 17 years                 | 6.30  | 2.50 | 6.40  | 2.40 | 6.20  | 2.70 | 6.7E-01 |
| Disability 18 to 34 years                | 7.10  | 2.30 | 6.90  | 2.20 | 7.50  | 2.50 | 1.0E-01 |
| Disability 35 to 64 years                | 13.00 | 3.90 | 12.50 | 4.10 | 13.70 | 3.50 | 2.3E-02 |
| Disability 65 to 74 years                | 23.30 | 5.20 | 22.40 | 5.30 | 24.70 | 4.80 | 2.3E-03 |
| Disability 75 years and over             | 47.10 | 6.00 | 46.60 | 6.20 | 47.70 | 5.60 | 1.8E-01 |
| Disability hearing difficulty            | 3.70  | 1.10 | 3.40  | 0.96 | 4.10  | 1.10 | 9.0E-06 |
| Disability vision difficulty             | 2.20  | 0.77 | 2.20  | 0.78 | 2.30  | 0.74 | 2.3E-01 |
| Disability cognitive difficulty          | 5.40  | 1.40 | 5.30  | 1.50 | 5.50  | 1.30 | 3.0E-01 |
| Disability ambulatory difficulty         | 7.00  | 1.70 | 6.80  | 1.70 | 7.20  | 1.60 | 1.3E-01 |
| Disability self-care difficulty          | 2.70  | 0.71 | 2.80  | 0.70 | 6.00  | 1.40 | 8.3E-01 |
| Disability independent living difficulty | 6.10  | 1.40 | 6.00  | 1.40 | 6.20  | 1.30 | 4.2E-01 |

+ All reported numbers are in percent except total population, SARS-CoV-2 infection rate, and median income.

\* Rate of SARS-CoV-2 infection in one per Million

Table S5: Detailed results of the bivariate analysis of the rate of infection by SARS-CoV-2 when controlled for the state, median income, and total population

| Risk Factors                             | Estimate  | Standard Error | Statistic | p-value  | Conf.low  | Conf.high | Estimate_95CI         |
|------------------------------------------|-----------|----------------|-----------|----------|-----------|-----------|-----------------------|
| Disability                               | -8.40E-02 | 8.27E-02       | -1.02E+00 | 3.11E-01 | -2.47E-01 | 7.91E-02  | -0.08 (-0.25 - 0.08)  |
| Disability male                          | -8.90E-02 | 9.70E-02       | -9.21E-01 | 3.59E-01 | -2.81E-01 | 1.02E-01  | -0.09 (-0.28 - 0.10)  |
| Disability female                        | -1.60E-02 | 9.34E-02       | -1.72E-01 | 8.64E-01 | -2.01E-01 | 1.69E-01  | -0.02 (-0.20 - 0.17)  |
| Disability Black                         | -1.14E-01 | 8.94E-02       | -1.28E+00 | 2.04E-01 | -2.92E-01 | 6.32E-02  | -0.11 (-0.29 - 0.06)  |
| Disability Asian                         | 1.40E-01  | 1.09E-01       | 1.28E+00  | 2.05E-01 | -7.81E-02 | 3.58E-01  | 0.14 (-0.08 - 0.36)   |
| Disability White alone                   | -5.80E-02 | 1.01E-01       | -5.70E-01 | 5.69E-01 | -2.58E-01 | 1.43E-01  | -0.06 (-0.26 - 0.14)  |
| Disability Hispanic                      | -7.00E-03 | 8.94E-02       | -8.28E-02 | 9.34E-01 | -1.85E-01 | 1.70E-01  | -0.01 (-0.19 - 0.17)  |
| Disability 5 to 17 Years                 | 7.80E-02  | 7.46E-02       | 1.04E+00  | 2.99E-01 | -6.98E-02 | 2.25E-01  | 0.08 (-0.07 - 0.23)   |
| Disability 18 to 34 Years                | -1.40E-01 | 7.84E-02       | -1.78E+00 | 7.71E-02 | -2.95E-01 | 1.54E-02  | -0.14 (-0.30 - 0.02)  |
| Disability 35 to 64 Years                | -6.30E-02 | 1.02E-01       | -6.13E-01 | 5.41E-01 | -2.65E-01 | 1.40E-01  | -0.06 (-0.265 - 0.14) |
| Disability 65 to 74 Years                | -1.10E-02 | 8.94E-02       | -1.18E-01 | 9.06E-01 | -1.87E-01 | 1.66E-01  | -0.01 (-0.19 - 0.17)  |
| Disability 75 Years and Over             | 7.10E-02  | 7.25E-02       | 9.82E-01  | 3.28E-01 | -7.22E-02 | 2.15E-01  | 0.07 (-0.07 - 0.22)   |
| Disability hearing difficulty            | -8.80E-02 | 8.40E-02       | -1.05E+00 | 2.97E-01 | -2.54E-01 | 7.82E-02  | -0.09 (-0.25 - 0.08)  |
| Disability vision difficulty             | 1.20E-02  | 7.96E-02       | 1.46E-01  | 8.84E-01 | -1.46E-01 | 1.69E-01  | 0.01 (-0.15 - 0.17)   |
| Disability cognitive difficulty          | -7.00E-02 | 8.96E-02       | -7.83E-01 | 4.35E-01 | -2.47E-01 | 1.07E-01  | -0.07 (-0.25 - 0.11)  |
| Disability ambulatory difficulty         | 3.50E-02  | 9.06E-02       | 3.87E-01  | 7.00E-01 | -1.44E-01 | 2.14E-01  | 0.04 (-0.14 - 0.21)   |
| Disability self-care difficulty          | 4.90E-02  | 7.47E-02       | 6.52E-01  | 5.15E-01 | -9.91E-02 | 1.97E-01  | 0.05 (-0.10 - 0.20)   |
| Disability independent living difficulty | 6.50E-02  | 7.89E-02       | 8.30E-01  | 4.08E-01 | -9.05E-02 | 2.21E-01  | 0.07 (-0.091 - 0.22)  |

Table S4: Detailed results of the bivariate analysis of the risk of infection by SARS-CoV-2 when controlled for state, and median income

| Risk Factors                             | Estimate  | Standard error | Statistic | p-value  | Conf.low  | Conf.high | Estimate_95CI          |
|------------------------------------------|-----------|----------------|-----------|----------|-----------|-----------|------------------------|
| Disability                               | -1.69E-01 | 8.64E-02       | -1.95E+00 | 5.24E-02 | -3.39E-01 | 1.78E-03  | -0.17 (-0.34 - 0.002)  |
| Disability male                          | -2.53E-01 | 9.75E-02       | -2.60E+00 | 1.04E-02 | -4.46E-01 | -6.03E-02 | -0.25 (-0.45 - -0.06)  |
| Disability female                        | -8.10E-02 | 1.00E-01       | -8.02E-01 | 4.24E-01 | -2.79E-01 | 1.18E-01  | -0.08 (-0.28 - 0.12)   |
| Disability Black                         | -1.33E-01 | 9.67E-02       | -1.37E+00 | 1.73E-01 | -3.24E-01 | 5.91E-02  | -0.13 ( -0.32 - 0.06)  |
| Disability Asian                         | 6.90E-02  | 1.16E-01       | 5.93E-01  | 5.55E-01 | -1.62E-01 | 3.00E-01  | 0.07 (-0.16 - 0.3)     |
| Disability White alone                   | -2.23E-01 | 1.03E-01       | -2.15E+00 | 3.30E-02 | -4.27E-01 | -1.82E-02 | -0.22 ( -0.43 - -0.02) |
| Disability Hispanic                      | -7.60E-02 | 9.63E-02       | -7.93E-01 | 4.29E-01 | -2.67E-01 | 1.14E-01  | -0.08 ( -0.27 - 0.11)  |
| Disability 5 to 17 Years                 | -1.90E-02 | 8.14E-02       | -2.33E-01 | 8.16E-01 | -1.80E-01 | 1.42E-01  | -0.02 (-0.18 - 0.14)   |
| Disability 18 to 34 Years                | -2.52E-01 | 8.16E-02       | -3.09E+00 | 2.44E-03 | -4.13E-01 | -9.05E-02 | -0.25( -0.41 - -0.09)  |
| Disability 35 to 64 Years                | -7.80E-02 | 1.11E-01       | -7.00E-01 | 4.85E-01 | -2.97E-01 | 1.41E-01  | -0.08 ( -0.30 - 0.14)  |
| Disability 65 to 74 Years                | 6.70E-02  | 9.76E-02       | 6.83E-01  | 4.96E-01 | -1.26E-01 | 2.60E-01  | 0.07 ( -0.13 - 0.26)   |
| Disability 75 Years and Over             | 1.20E-01  | 7.94E-02       | 1.52E+00  | 1.31E-01 | -3.65E-02 | 2.77E-01  | 0.12 ( -0.04 - 0.28)   |
| Disability hearing difficulty            | -2.63E-01 | 7.99E-02       | -3.29E+00 | 1.25E-03 | -4.21E-01 | -1.05E-01 | -0.26 ( -0.42 - -0.11) |
| Disability vision difficulty             | 6.40E-02  | 8.72E-02       | 7.38E-01  | 4.62E-01 | -1.08E-01 | 2.37E-01  | 0.06 (-0.108 - 0.24)   |
| Disability cognitive difficulty          | -1.22E-01 | 9.78E-02       | -1.25E+00 | 2.14E-01 | -3.15E-01 | 7.13E-02  | -0.12 ( -0.32 - 0.07)  |
| Disability ambulatory difficulty         | 2.20E-02  | 9.86E-02       | 2.20E-01  | 8.26E-01 | -1.73E-01 | 2.17E-01  | 0.02 ( -0.17 - 0.22)   |
| Disability self-care difficulty          | 1.15E-01  | 8.10E-02       | 1.42E+00  | 1.59E-01 | -4.53E-02 | 2.75E-01  | 0.12 ( -0.05 - 0.28)   |
| Disability independent living difficulty | 1.01E-01  | 8.64E-02       | 1.16E+00  | 2.47E-01 | -7.03E-02 | 2.71E-01  | 0.10 ( -0.07 - 0.27)   |

Table S3: Detailed results of the bivariate analysis of the risk of death by SARS-CoV-2 when controlled for the state, median income, and total population

| Risk Factors                             | Estimate  | Standard Error | Statistic | p-value  | Conf.low  | Conf.high | Estimate_95CI         |
|------------------------------------------|-----------|----------------|-----------|----------|-----------|-----------|-----------------------|
| Disability                               | 5.30E-02  | 1.05E-01       | 5.03E-01  | 6.16E-01 | -1.54E-01 | 2.59E-01  | 0.05 ( -0.15 - 0.26)  |
| Disability male                          | 1.59E-01  | 9.97E-02       | 1.60E+00  | 1.12E-01 | -3.75E-02 | 3.56E-01  | 0.16 ( -0.04 - 0.36)  |
| Disability female                        | 1.48E-01  | 9.73E-02       | 1.52E+00  | 1.31E-01 | -4.46E-02 | 3.40E-01  | 0.15 ( -0.05 - 0.34)  |
| Disability Black                         | 1.11E-01  | 7.28E-02       | 1.53E+00  | 1.30E-01 | -3.31E-02 | 2.55E-01  | 0.11 ( -0.03 - 0.26)  |
| Disability Asian                         | -6.00E-02 | 7.56E-02       | -7.90E-01 | 4.32E-01 | -2.10E-01 | 9.07E-02  | -0.06 ( -0.21 - 0.09) |
| Disability White alone                   | 2.08E-01  | 9.93E-02       | 2.10E+00  | 3.77E-02 | 1.20E-02  | 4.05E-01  | 0.21 (0.012 - 0.41)   |
| Disability Hispanic                      | -3.30E-02 | 8.39E-02       | -3.91E-01 | 6.96E-01 | -1.99E-01 | 1.33E-01  | -0.03 ( -0.20 - 0.13) |
| Disability 5 to 17 Years                 | -5.70E-02 | 8.11E-02       | -7.03E-01 | 4.83E-01 | -2.17E-01 | 1.03E-01  | -0.06 ( -0.22 - 0.10) |
| Disability 18 to 34 Years                | 1.95E-01  | 8.19E-02       | 2.38E+00  | 1.89E-02 | 3.27E-02  | 3.57E-01  | 0.20 (0.03 - 0.36)    |
| Disability 35 to 64 Years                | 1.46E-01  | 1.06E-01       | 1.37E+00  | 1.72E-01 | -6.43E-02 | 3.56E-01  | 0.15 ( -0.06 - 0.36)  |
| Disability 65 to 74 Years                | 7.50E-02  | 9.46E-02       | 7.91E-01  | 4.30E-01 | -1.12E-01 | 2.62E-01  | 0.08 ( -0.11 - 0.26)  |
| Disability 75 Years and Over             | -4.50E-02 | 7.65E-02       | -5.88E-01 | 5.57E-01 | -1.96E-01 | 1.06E-01  | -0.05 ( -0.20 - 0.11) |
| Disability hearing difficulty            | 9.00E-02  | 8.58E-02       | 1.05E+00  | 2.97E-01 | -7.99E-02 | 2.59E-01  | 0.09 ( -0.08 - 0.26)  |
| Disability vision difficulty             | 7.40E-02  | 8.21E-02       | 8.99E-01  | 3.70E-01 | -8.84E-02 | 2.36E-01  | 0.07 ( -0.09 - 0.24)  |
| Disability cognitive difficulty          | 1.04E-01  | 9.48E-02       | 1.10E+00  | 2.73E-01 | -8.30E-02 | 2.92E-01  | 0.10 ( -0.08 - 0.30)  |
| Disability ambulatory difficulty         | 1.17E-01  | 9.51E-02       | 1.23E+00  | 2.21E-01 | -7.12E-02 | 3.05E-01  | 0.12 ( -0.07 - 0.31)  |
| Disability self-care difficulty          | 7.70E-02  | 7.82E-02       | 9.84E-01  | 3.27E-01 | -7.76E-02 | 2.32E-01  | 0.08 ( -0.08 - 0.23)  |
| Disability independent living difficulty | 1.62E-01  | 8.21E-02       | 1.97E+00  | 5.04E-02 | -2.82E-04 | 3.24E-01  | 0.16 (0 - 0.32)       |



Table S2: Detailed results of the bivariate analysis of risk of death by SARS-CoV-2 when controlled for state, and median income

| Risk Factors                             | Estimate  | Standard Error | Statistic | p-value  | Conf.low  | Conf.high | Estimate_95CI         |
|------------------------------------------|-----------|----------------|-----------|----------|-----------|-----------|-----------------------|
| Disability                               | 9.40E-02  | 9.87E-02       | 9.51E-01  | 3.43E-01 | -1.01E-01 | 2.88E-01  | 0.09 (-0.10 - 0.29)   |
| Disability male                          | 1.37E-01  | 8.52E-02       | 1.61E+00  | 1.09E-01 | -3.11E-02 | 3.06E-01  | 0.14 (-0.03 - 0.31)   |
| Disability female                        | 1.43E-01  | 9.00E-02       | 1.59E+00  | 1.14E-01 | -3.49E-02 | 3.21E-01  | 0.14 ( -0.04 - 0.32)  |
| Disability Black                         | 9.50E-02  | 6.85E-02       | 1.39E+00  | 1.67E-01 | -4.04E-02 | 2.31E-01  | 0.10 ( -0.04 - 0.23)  |
| Disability Asian                         | -7.00E-02 | 7.13E-02       | -9.79E-01 | 3.30E-01 | -2.12E-01 | 7.19E-02  | -0.07 ( -0.21 - 0.07) |
| Disability White alone                   | 1.89E-01  | 8.98E-02       | 2.11E+00  | 3.67E-02 | 1.18E-02  | 3.66E-01  | 0.19 (0.012 - 0.37)   |
| Disability Hispanic                      | -3.00E-02 | 7.92E-02       | -3.83E-01 | 7.02E-01 | -1.87E-01 | 1.26E-01  | -0.03 (-0.19 - 0.13)  |
| Disability 5 to 17 Years                 | -5.10E-02 | 7.63E-02       | -6.67E-01 | 5.05E-01 | -2.02E-01 | 9.99E-02  | -0.05(-0.20 - 0.1)    |
| Disability 18 to 34 Years                | 1.66E-01  | 7.30E-02       | 2.27E+00  | 2.43E-02 | 2.18E-02  | 3.10E-01  | 0.17 (0.02 - 0.31)    |
| Disability 35 to 64 Years                | 1.31E-01  | 9.81E-02       | 1.33E+00  | 1.84E-01 | -6.28E-02 | 3.25E-01  | 0.13 (-0.06 - 0.33)   |
| Disability 65 to 74 Years                | 6.70E-02  | 9.06E-02       | 7.38E-01  | 4.62E-01 | -1.12E-01 | 2.46E-01  | 0.07 ( -0.11 - 0.25)  |
| Disability 75 Years and Over             | -4.40E-02 | 7.41E-02       | -5.98E-01 | 5.51E-01 | -1.91E-01 | 1.02E-01  | -0.04 (-0.191 - 0.10) |
| Disability hearing difficulty            | 8.80E-02  | 7.12E-02       | 1.23E+00  | 2.20E-01 | -5.30E-02 | 2.28E-01  | 0.09 (-0.05 - 0.23)   |
| Disability vision difficulty             | 6.70E-02  | 7.88E-02       | 8.51E-01  | 3.96E-01 | -8.86E-02 | 2.23E-01  | 0.07 (-0.09 - 0.22)   |
| Disability cognitive difficulty          | 9.00E-02  | 8.79E-02       | 1.03E+00  | 3.06E-01 | -8.33E-02 | 2.64E-01  | 0.09 (-0.08 - 0.26)   |
| Disability ambulatory difficulty         | 1.19E-01  | 9.00E-02       | 1.32E+00  | 1.87E-01 | -5.85E-02 | 2.97E-01  | 0.12 (-0.06 - 0.30)   |
| Disability self-care difficulty          | 6.10E-02  | 7.48E-02       | 8.17E-01  | 4.15E-01 | -8.67E-02 | 2.09E-01  | 0.06 (-0.09 - 0.21)   |
| Disability independent living difficulty | 1.49E-01  | 7.85E-02       | 1.89E+00  | 6.02E-02 | -6.47E-03 | 3.04E-01  | 0.15 ( -0.01 - 0.30)  |

Table S1: Independent sample t-test with comprehensive summary statistics comparing counties data elements: mean, minimum, maximum, confidence interval lower and upper bound

| Data Elements                 | Mean <sup>+</sup> | Minimum | Maximum    | 95% Confidence Interval Lower Bound | 95% Confidence Interval Upper Bound |
|-------------------------------|-------------------|---------|------------|-------------------------------------|-------------------------------------|
| Total population              | 276905.5          | 1129.0  | 10039107.0 | 206987.7                            | 346823.2                            |
| SARS-CoV-2 infection rate*    | 1593.0            | 15.4    | 20458.0    | 1302.8                              | 1883.3                              |
| SARS-CoV-2 related death rate | 3.8               | 0.3     | 10.1       | 3.5                                 | 4.1                                 |
| Retail mobility               | -0.5              | -1.0    | 0.4        | -0.5                                | -0.4                                |
| Grocery mobility              | -0.2              | -0.7    | 0.3        | -0.2                                | -0.1                                |
| Park mobility                 | 0.0               | -0.9    | 1.8        | 0.0                                 | 0.1                                 |
| Transit mobility              | -0.5              | -0.9    | 0.7        | -0.5                                | -0.4                                |
| Work mobility                 | -0.4              | -0.7    | 0.5        | -0.4                                | -0.4                                |
| Resident mobility             | 0.1               | 0.0     | 0.3        | 0.1                                 | 0.1                                 |
| Black male                    | 5.3               | 0.0     | 37.5       | 4.6                                 | 6.0                                 |
| Black female                  | 4.9               | 0.1     | 32.8       | 4.2                                 | 5.6                                 |
| Asian male                    | 1.5               | 0.0     | 19.0       | 1.2                                 | 1.7                                 |
| Asian female                  | 1.6               | 0.0     | 19.3       | 1.4                                 | 1.9                                 |
| White male                    | 37.1              | 4.5     | 50.3       | 36.1                                | 38.1                                |
| White female                  | 37.6              | 4.7     | 49.0       | 36.5                                | 38.6                                |
| Hispanic male                 | 5.2               | 0.4     | 42.3       | 72.6                                | 76.7                                |
| Hispanic female               | 4.8               | 0.4     | 42.3       | 4.1                                 | 5.5                                 |
| Median income                 | 69910.1           | 30717.0 | 147878.0   | 67934.9                             | 71885.4                             |
| Poverty                       | 15.1              | 4.6     | 48.6       | 14.5                                | 15.7                                |
| High school                   | 87.6              | 68.5    | 96.1       | 87.0                                | 88.1                                |
| Bachelors                     | 24.6              | 7.4     | 60.8       | 23.5                                | 25.7                                |
| Insured male                  | 91.5              | 72.4    | 97.5       | 91.1                                | 91.8                                |
| Insured female                | 93.6              | 80.1    | 98.4       | 93.3                                | 93.9                                |
| Insured Black                 | 91.4              | 46.7    | 100.0      | 90.7                                | 92.0                                |
| Insured Asian                 | 90.3              | 0.0     | 100.0      | 89.0                                | 91.5                                |
| Insured Hispanic              | 85.9              | 30.3    | 100.0      | 84.9                                | 87.0                                |
| Insured White alone           | 93.9              | 80.9    | 98.4       | 93.6                                | 94.1                                |
| Medicaid                      | 23.2              | 6.9     | 48.4       | 22.5                                | 23.9                                |
| Disability                    | 15.0              | 6.5     | 28.5       | 14.6                                | 15.4                                |
| Disability male               | 13.1              | 7.1     | 22.3       | 12.6                                | 13.5                                |
| Disability female             | 13.4              | 7.7     | 20.5       | 13.0                                | 13.8                                |
| Disability Black              | 15.4              | 4.5     | 57.7       | 14.4                                | 16.4                                |
| Disability Asian              | 7.9               | 2.3     | 33.1       | 7.1                                 | 8.6                                 |
| Disability White              | 14.0              | 7.2     | 20.7       | 13.6                                | 14.4                                |
| Disability Hispanic           | 11.4              | 3.6     | 33.0       | 10.6                                | 12.2                                |
| Disability 5 to 17 years      | 6.3               | 1.9     | 13.9       | 6.0                                 | 6.7                                 |
| Disability 18 to 34 years     | 7.1               | 2.3     | 16.4       | 6.8                                 | 7.4                                 |
| Disability 35 to 64 years     | 13.0              | 4.9     | 25.6       | 12.5                                | 13.6                                |
| Disability 65 to 74 years     | 23.3              | 10.0    | 36.1       | 22.6                                | 24.1                                |
| Disability 75 years and over  | 47.1              | 32.3    | 67.7       | 46.2                                | 47.9                                |

|                                                 |     |     |      |     |     |
|-------------------------------------------------|-----|-----|------|-----|-----|
| <b>Disability hearing difficulty</b>            | 3.7 | 1.7 | 7.2  | 3.5 | 3.8 |
| <b>Disability vision difficulty</b>             | 2.2 | 0.8 | 4.8  | 2.1 | 2.4 |
| <b>Disability cognitive difficulty</b>          | 5.4 | 2.6 | 10.5 | 5.2 | 5.6 |
| <b>Disability ambulatory difficulty</b>         | 7.0 | 3.4 | 11.2 | 6.7 | 7.2 |
| <b>Disability self-care Difficulty</b>          | 2.7 | 1.1 | 6.1  | 2.6 | 2.8 |
| <b>Disability independent living difficulty</b> | 6.1 | 2.9 | 10.7 | 5.9 | 6.3 |

+ All reported numbers are in percent except total population, SARS-CoV-2 infection rate, and median income.

\* Rate of SARS-CoV-2 infection in one per Million

Fig S2: Infection due to SARS-CoV-2 controlled for the state, median income, and total population

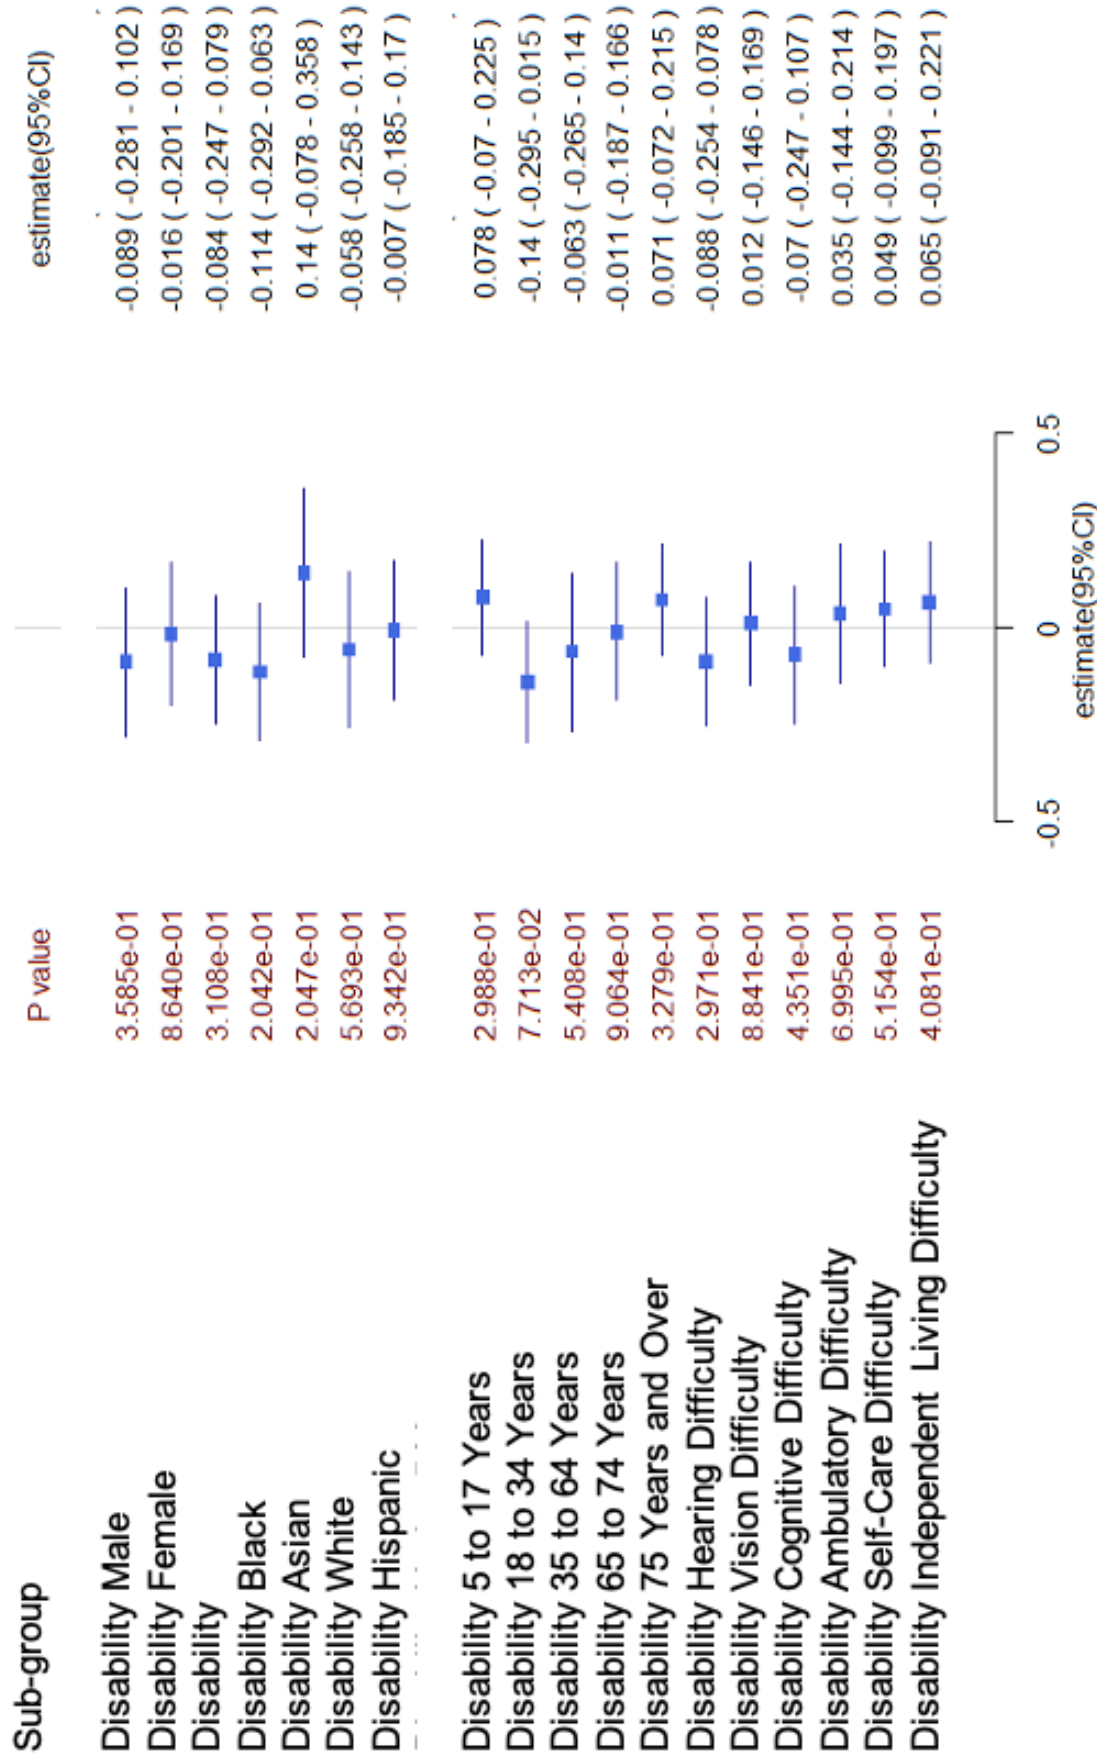

Fig S1: Death due to SARS-CoV-2 controlled for the state, median income, and total population

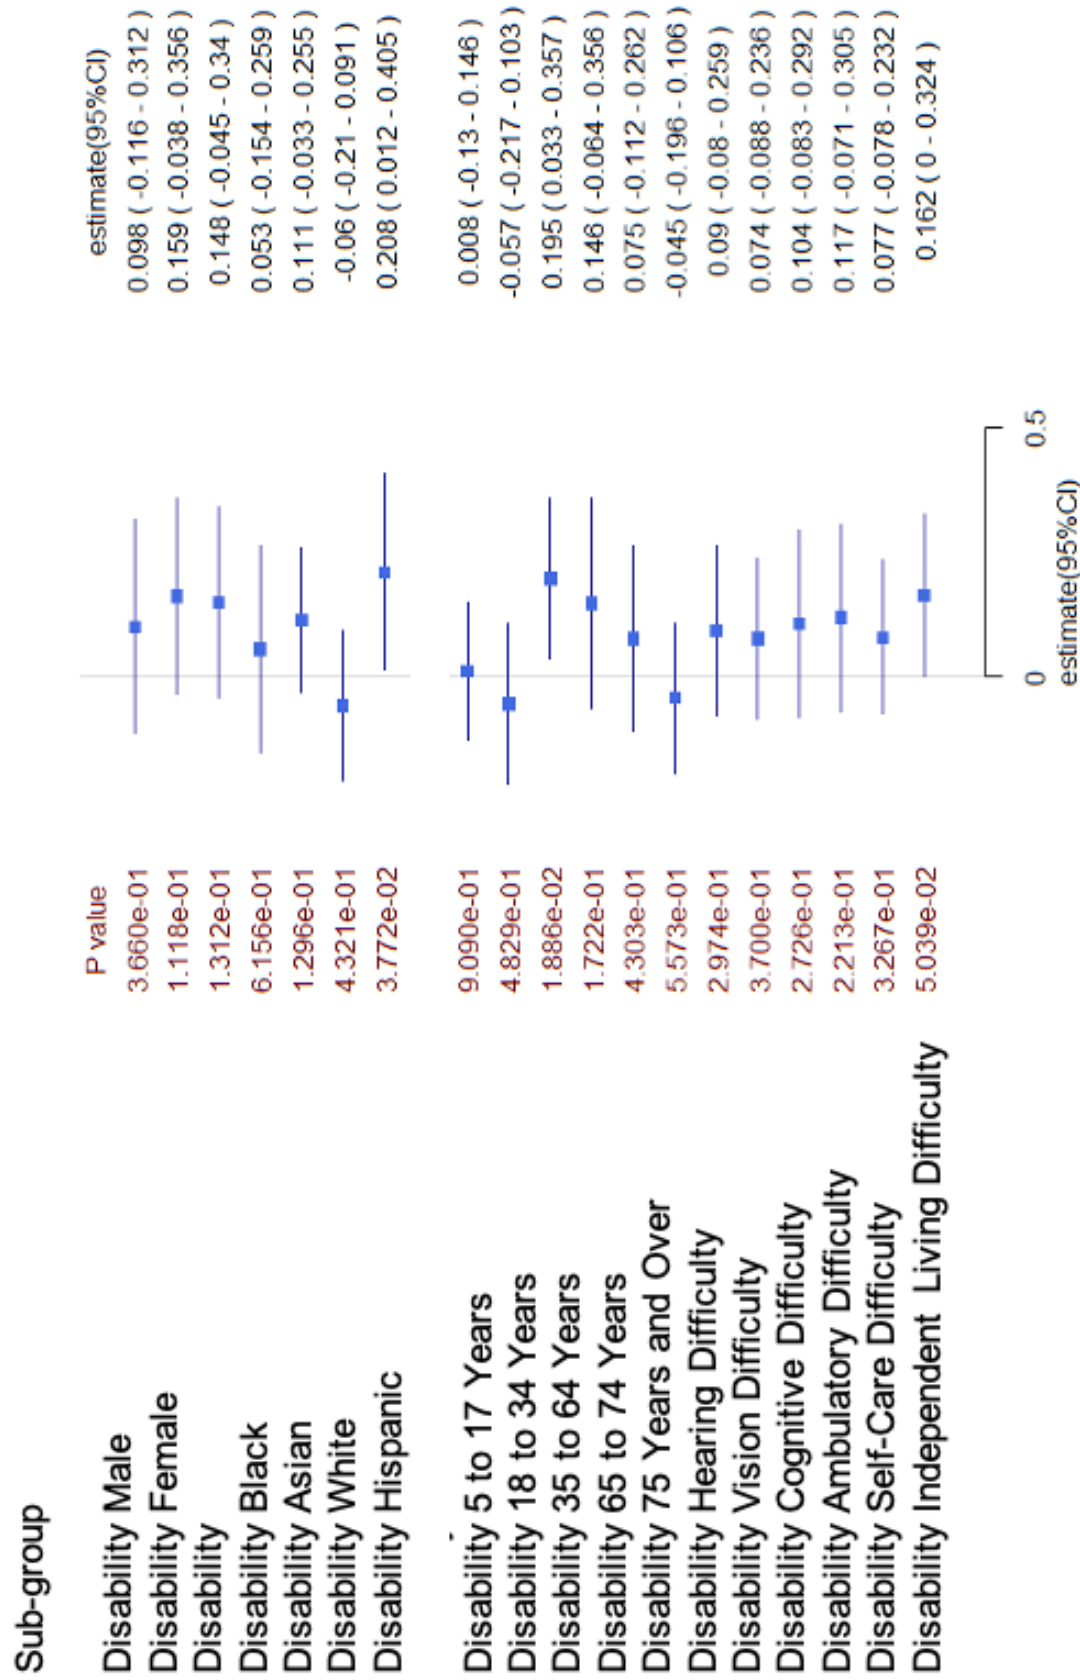

Fig 2: Infection due to SARS-CoV-2 when controlled for state, and median income

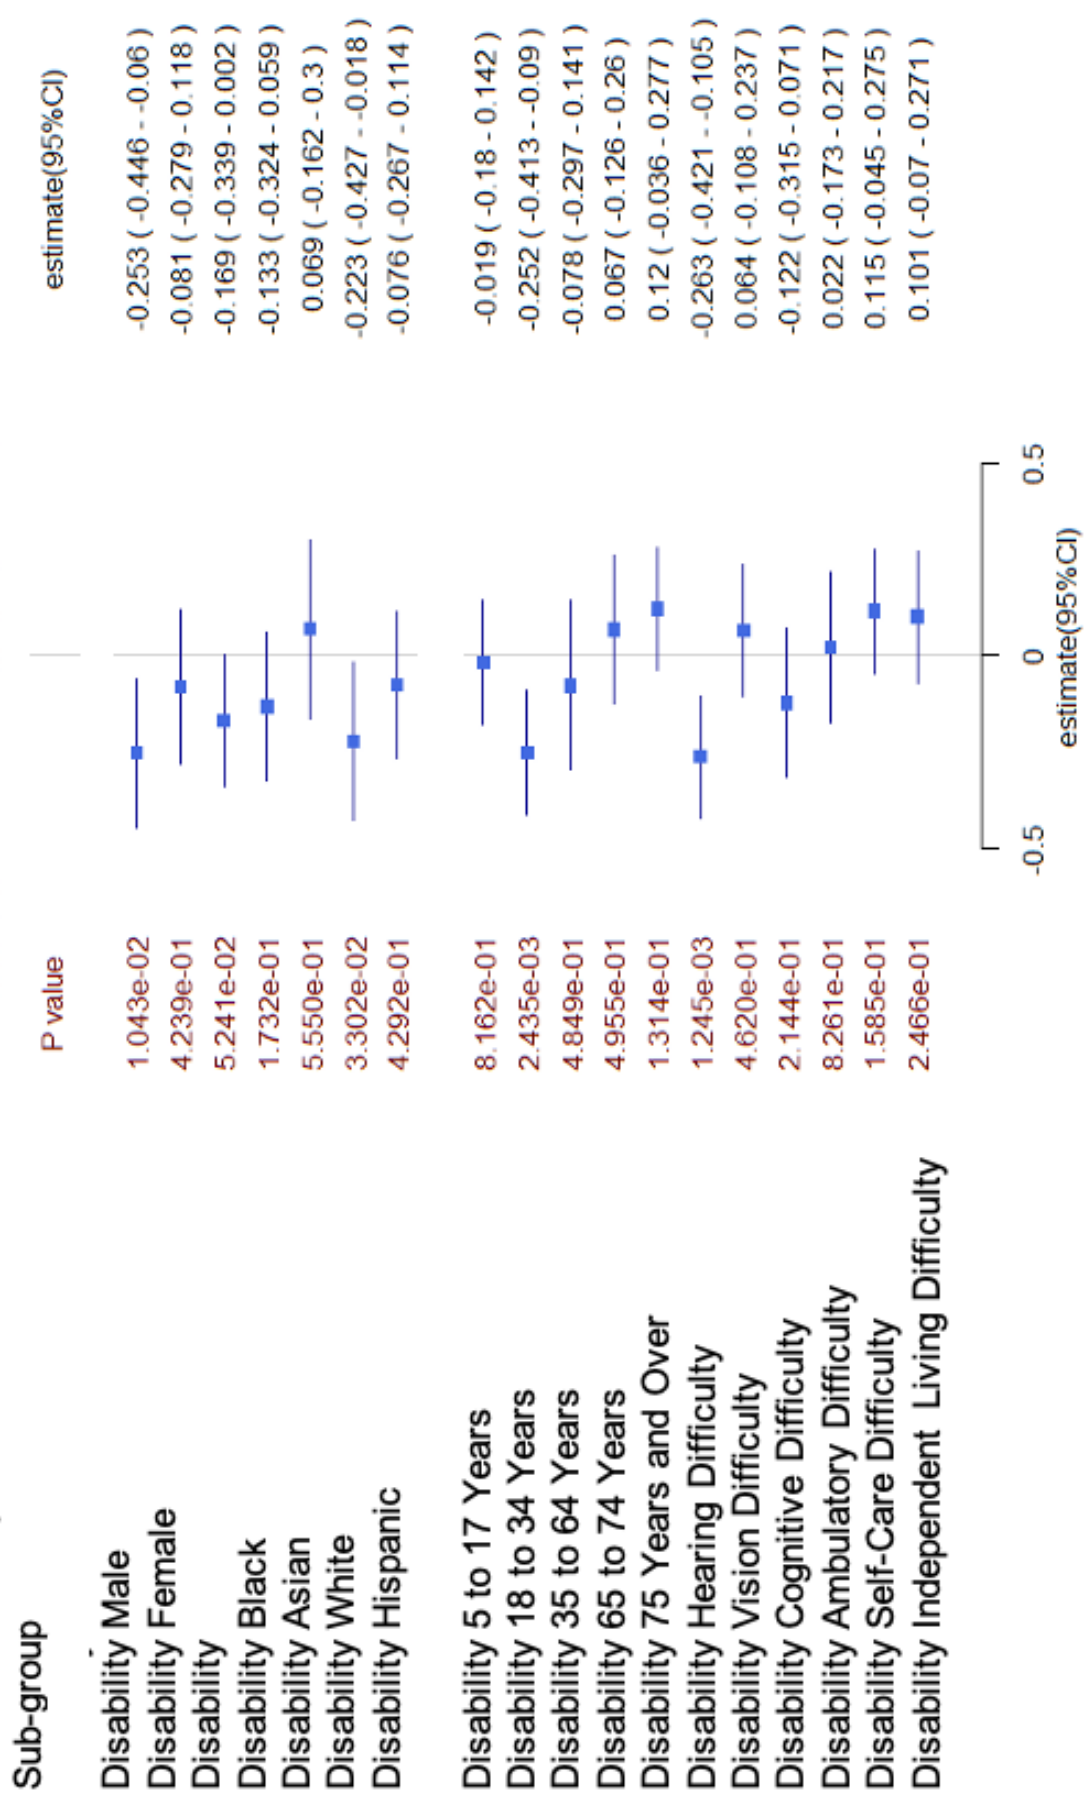

Fig 1: Death due to SARS-CoV-2 when controlled for state and median income

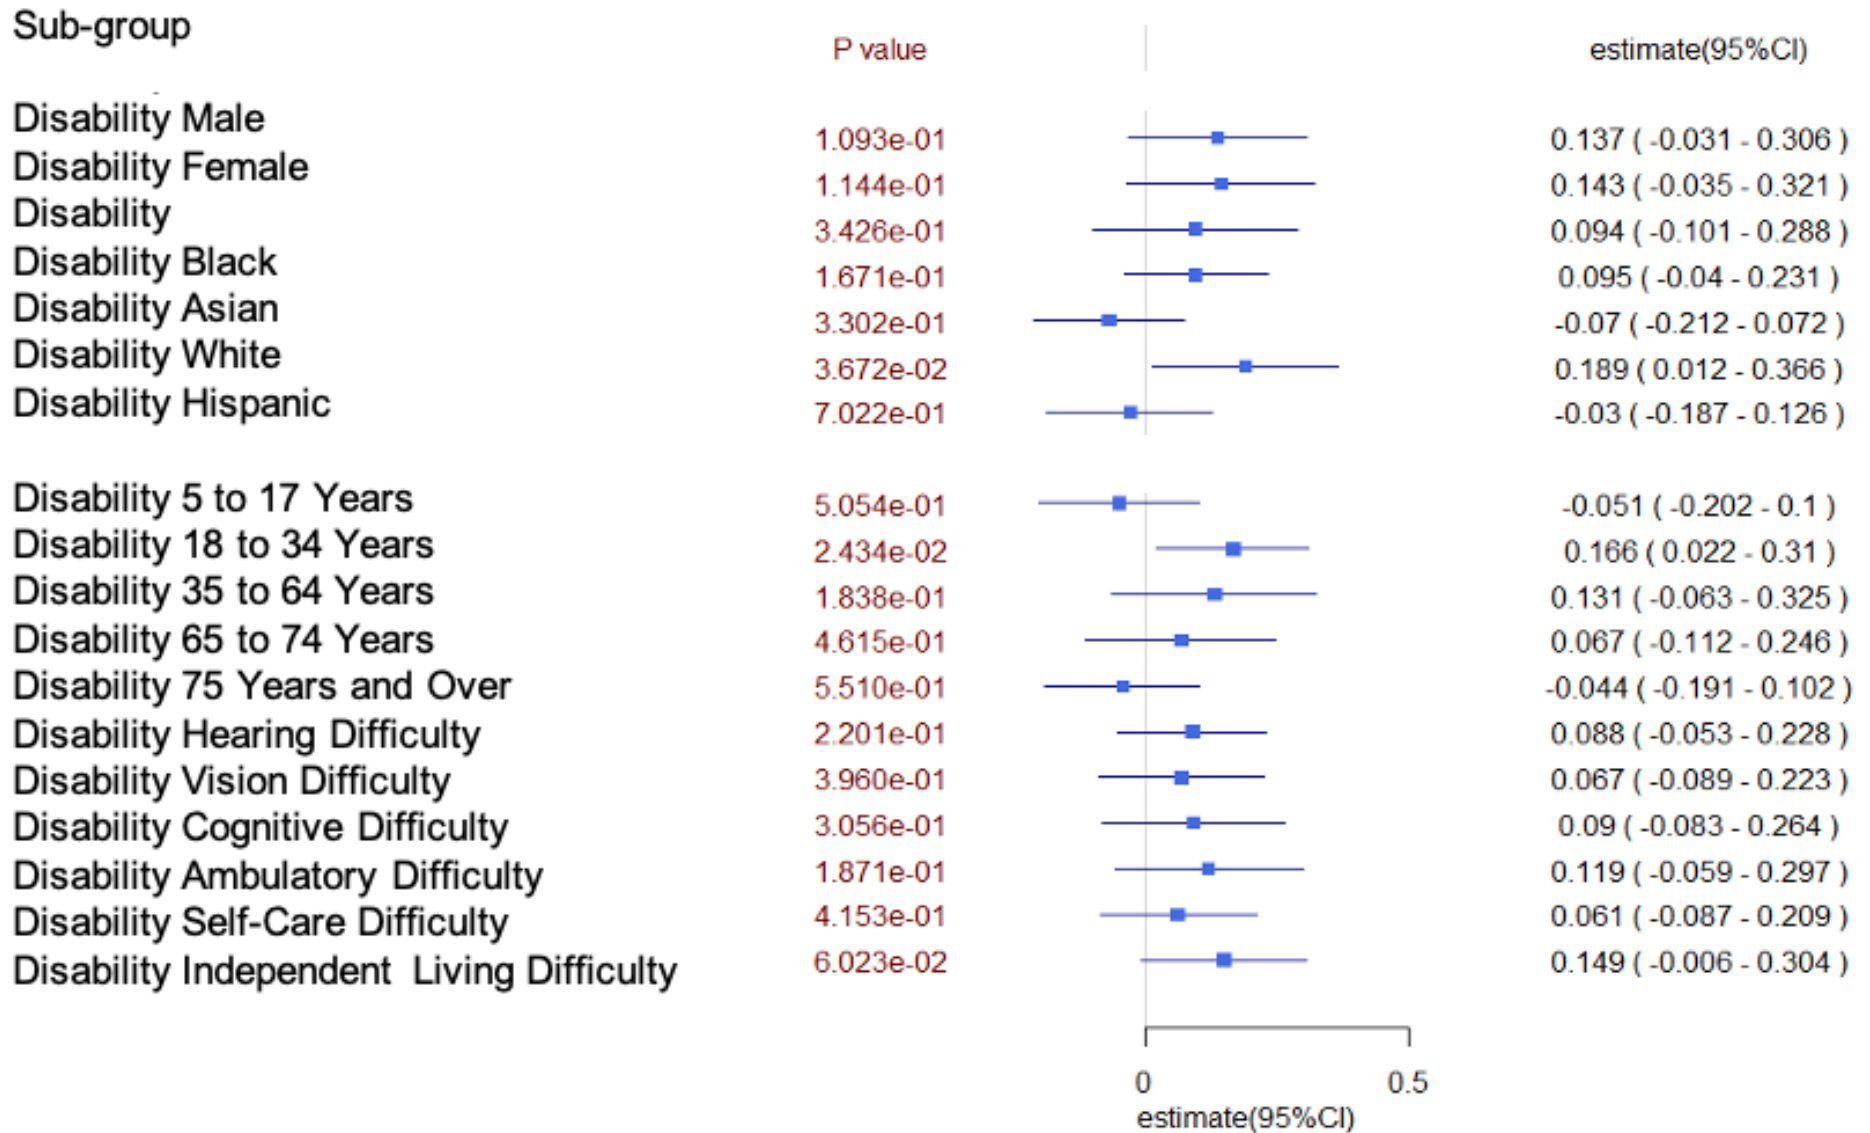

Source: https://medrxiv.org/content/10.1101/2020.06.24.20139212v1.full.pdf
